# Supplementary material
Source: PubMed Central journal article supplement (PMC8693798)
Supplement: NIHMS1758829-supplement-SuppMat.pdf [file NIHMS1758829-supplement-SuppMat.pdf]

Table S1. Location and information for sequenced populations (DrosRTEC).

| <b>State</b>   | <b>City</b>     | <b>Year</b> | <b>Month</b> | <b>Latitude</b> | <b>Longitude</b> | <b>Altitude (m)</b> | <b>Collector</b>    |
|----------------|-----------------|-------------|--------------|-----------------|------------------|---------------------|---------------------|
| Florida        | Homestead       | 2008        | 7            | 25.47           | -80.47           | 1                   | Schmidt Lab         |
| Georgia        | Hahira          | 2008        | 7            | 30.99           | -83.37           | 69                  | Schmidt Lab         |
| South Carolina | Eutawville      | 2008        | 7            | 33.40           | -80.35           | 34                  | Schmidt Lab         |
| North Carolina | Raleigh         | 2003        | NA           | 35.78           | -78.64           | 106                 | Trudy Mackay (DGRP) |
| Virginia       | Charlottesville | 2012        | 7            | 38.03           | -78.48           | 140                 | Schmidt Lab         |
| Pennsylvania   | Media           | 2012        | 7            | 39.53           | -75.24           | 35                  | Schmidt Lab         |
| New York       | Ithaca          | 2012        | 9            | 42.44           | -76.50           | 121                 | Lazarro Lab         |
| Massachusetts  | Lancaster       | 2012        | 7            | 42.46           | -71.67           | 91                  | Schmidt Lab         |
| Wisconsin      | Cross Plains    | 2012        | 6            | 43.09           | -89.66           | 295                 | Pool Lab            |
| Maine          | Bowdoinham      | 2010        | 10           | 44.02           | -69.88           | 17                  | Schmidt Lab         |

Table S2. Allelic and line information for construction of the recombinant outbred (ROP) populations. HL denotes the *foxo* genotype common at high latitudes, as defined by the two-SNP haplotype, and LL the *foxo* genotype at higher incidence at low latitude. The experimental design included two biological replicates, using independent, non-overlapping sets of inbred lines, for each assayed genotype; these replicates are given as Set (A,B for the HL genotype and C,D for the low latitude genotype). Each set was replicated twice, as denoted by Cage. The last column denotes the line numbers for each inbred line from the Drosophila Genetics Reference Panel (DGRP) used to establish each of the eight individual cages.

| <i>foxo</i> Genotype | Nucleotide Position       | Set | Cage | Lines used (N = 18 per cage)                                                             |
|----------------------|---------------------------|-----|------|------------------------------------------------------------------------------------------|
| LL                   | 3R:9892517 / 9894559 (GG) | A   | 1    | 26, 57, 73, 75, 91, 101, 105, 161, 176, 280, 313, 318, 367, 371, 375, 377, 378, 379      |
| LL                   | 3R:9892517 / 9894559 (GG) | A   | 2    | 26, 57, 73, 75, 91, 101, 105, 161, 176, 280, 313, 318, 367, 371, 375, 377, 378, 379      |
| LL                   | 3R:9892517 / 9894559 (GG) | B   | 3    | 208, 373, 406, 426, 440, 491, 492, 508, 513, 535, 639, 646, 757, 761, 796, 805, 812, 852 |
| LL                   | 3R:9892517 / 9894559 (GG) | B   | 4    | 208, 373, 406, 426, 440, 491, 492, 508, 513, 535, 639, 646, 757, 761, 796, 805, 812, 852 |
| HL                   | 3R:9892517 / 9894559 (AT) | C   | 5    | 40, 41, 42, 69, 83, 109, 142, 153, 158, 177, 195, 229, 233, 365, 370, 380, 391, 405      |
| HL                   | 3R:9892517 / 9894559 (AT) | C   | 6    | 40, 41, 42, 69, 83, 109, 142, 153, 158, 177, 195, 229, 233, 365, 370, 380, 391, 405      |
| HL                   | 3R:9892517 / 9894559 (AT) | D   | 7    | 45, 332, 338, 443, 517, 531, 595, 703, 705, 707, 774, 790, 804, 820, 837, 855, 879, 890  |
| HL                   | 3R:9892517 / 9894559 (AT) | D   | 8    | 45, 332, 338, 443, 517, 531, 595, 703, 705, 707, 774, 790, 804, 820, 837, 855, 879, 890  |

**TABLE S3**

| Trait                       | Sex                                         |                                              |
|-----------------------------|---------------------------------------------|----------------------------------------------|
|                             | Female                                      | Male                                         |
| <b>Development time</b>     | $F_{1,1675} = 7.962^{**}$<br>$R^2 = 0.004$  | $F_{1,1699} = 1.112$<br>$R^2 = 0.0007$       |
| <b>Wing area</b>            | $F_{1,739} = 168.5^{***}$<br>$R^2 = 0.1846$ | $F_{1,742} = 143.5^{***}$<br>$R^2 = 0.1609$  |
| <b>Wing loading</b>         | $F_{1,738} = 137.3^{***}$<br>$R^2 = 0.1557$ | $F_{1,742} = 133.5^{***}$<br>$R^2 = 0.1514$  |
| <b>Starvation tolerance</b> | $F_{1,1115} = 83.7^{***}$<br>$R^2 = 0.0689$ | $F_{1,1098} = 57.54^{***}$<br>$R^2 = 0.0489$ |

\*  $p < 0.05$ ; \*\*  $p < 0.01$ ; \*\*\*  $p < 0.001$ .

```

import sys
import collections
import math
from math import sqrt
from optparse import OptionParser,OptionGroup

#version 1.0
#Author: Martin Kapun

##### HELP
#####
###
#print
usage=""
parser = OptionParser(usage=usage)
group=OptionGroup(parser, "")
H E L P s:
_____

Description:
    """)

##### CODE
#####
###

parser.add_option("-d", "--dgrp", dest="d", help="dgrp data")
parser.add_option("-r", "--ref", dest="r", help="lines containing the
reference allele separated by a ','; SetA and Set B lines need to be
separated by a '+'")
parser.add_option("-a", "--alt", dest="a", help="lines containing the
alternative allele separated by a ','; SetA and Set B lines need to be
separated by a '+'")
parser.add_option("-o", "--out", dest="o", help="output file")
parser.add_option("-l", "--label", dest="l", help="label for IGV file
in IGVviewer",default="FST")
parser.add_option_group(group)
(options, args) = parser.parse_args()

## some functions

def lineparse(data,ln):
    "" parse a single line of the freeze2 SNP dataset of the DGRP
lines ""
    import collections
    a=data.rstrip().split()
    CHROM,POS,ID,REF,ALT,QUAL,FILTER,INFO,FORMAT=a[:9]
    allelecode={"0":REF}

```

```

# exclude indels
if len(ALT.split(","))>1:
    return "NA"
if len(ALT)>1 or len(REF)>1:
    return "NA"

for i in range(1,len(ALT.split(","))+1):
    allelecode[str(i)]=ALT.split(",")[i-1]
lines=a[9:]
allelecounts=collections.defaultdict(list)
for i in range(len(lines)):
    if i not in ln:
        continue
    for j in lines[i].split("/"):
        allelecounts[i].append(allelecode[j])
return CHROM,POS,allelecounts

def pi(x):
    """ calculate pi on a SNP-wise basis. where x is a vector of all
    allelefreqs and n is the samplesize)"""
    if x==[]:
        return "nan"
    else:
        corr=(len(x)-1)/float(len(x))
        freqsum=sum([y**2 for y in x])
        return (1-freqsum)*corr

def af(allelecounts,ln,lin):
    linestr=""
    afsf=collections.defaultdict(int)
    afs2=collections.defaultdict(float)
    #print allelecounts
    counts=0
    for k,v in allelecounts.items():
        if k not in ln:
            continue
        linestr+=str(ln[k])
        linestr+=":"
        for alle in v:
            afsf[alle]+=1
            counts+=1.0
            linestr+=alle
            linestr+=", "
    #print afsf,counts
    #print "af:",[x/counts for x in afsf.values()]
    for k,v in afsf.items():
        afs2[k]=v/counts

    return afs2,linestr

```

```

##### CODE
#####

# read data
dgrpdata=open(options.d,"r")
ref=options.r.split("+")
alt=options.a.split("+")
out=open(options.o,"w")
label=options.l

# define containers
linepos_hash=collections.defaultdict(lambda:collections.defaultdict(list))
lineID_hash=collections.defaultdict(lambda:collections.defaultdict(list))
out.write("Chromosome\tStart\tEnd\tfeature\tFST\n")
count=1

## make position hash for all datasets
for i in range(len(ref)):
    lineID_hash["ref"][i]=map(int,ref[i].split(","))
for i in range(len(alt)):
    lineID_hash["alt"][i]=map(int,alt[i].split(","))

linehash=collections.defaultdict(int)
positions=[]
## loop through all lines in SNP dataset
for l in dgrpdata:
    if count%100000==0:
        print count,"SNPs processed"
    count+=1
    if l.startswith("##"):
        continue
    if l.startswith("#"):
        linenames=map(int,[x.replace("DGRP-","") for x in l.split()
[9:]])
        for i in range(len(linenames)):
            linehash[linenames[i]]=i
        for allele,replicates in lineID_hash.items():
            for replicate,lines in replicates.items():
                for line in lines:
                    if line not in linehash:
                        continue
                    linepos_hash[allele]
[replicate].append(linehash[line])
                    if linehash[line] not in positions:
                        positions.append(linehash[line])
                continue
        linedata=lineparse(l,positions)

```

```

if linedata=="NA":
    continue
chr, pos, data=linedata
fstlist=[]
for i in range(len(linepos_hash["ref"])):
    for j in range(len(linepos_hash["alt"])):
        lines1=linepos_hash["ref"][i]
        lines2=linepos_hash["alt"][j]
        linestot=lines1+lines2
        af1=af(data,lines1,linenames)
        af2=af(data,lines2,linenames)
        aftot=af(data,linestot,linenames)
        p1=pi(af1[0].values())
        p2=pi(af2[0].values())
        ptot=pi(aftot[0].values())
        if ptot==0:
            fst="nan"
            continue
        elif "nan" in [p1,p2,ptot]:
            fst="nan"
        else:
            fst=(ptot-((p1+p2)/2))/ptot
        if fst<0:
            fst=0
        fstlist.append(fst)
if fstlist==[]:
    continue
out.write("\t".join(map(str,
[chr,int(pos)-1,pos,label,sum(fstlist)/len(fstlist)]))+"\n")

```

```
#!/bin/sh

# FST.sh
#
#
# Created by Martin Kapun on 25.06.18.
#

### calculating Weir & Cockerham (1984) FST among two sets of lines in
the DGRP dataset
### the DGRP lines need to be provided by a comma-separated list of
lines in plain numbers (i.e. without the "Ra1" prefix)
### The output is in IGV file format (http://
software.broadinstitute.org/software/igv/IGV)

python fst_dgrp.py \
--dgrp freeze2.bins_sorted.vcf \
--ref
59,138,181,208,228,320,332,338,357,374,426,437,443,491,508,509,535,554
,555,595 \
--alt
21,93,149,217,227,235,237,239,272,287,309,350,352,358,359,362,381,386,
392,406 \
--out > output.igv
```
